# Supplementary material
Source: PubMed Central journal article supplement (PMC7384252)
Supplement: NIHMS1584997-supplement-4.pdf [file NIHMS1584997-supplement-4.pdf]

## ANTIBODIES

| Name                                                          | SOURCE                          | IDENTIFIER              |
|---------------------------------------------------------------|---------------------------------|-------------------------|
| <i>LDLR</i>                                                   | <i>Abcam</i>                    | <i>ab52818</i>          |
| <i>mCherry</i>                                                | <i>Abcam</i>                    | <i>ab167453</i>         |
| <i>OS9</i>                                                    | <i>ABclonal</i>                 | <i>A12261</i>           |
| <i>SREBP2</i>                                                 | <i>BD Biosciences</i>           | <i>557037</i>           |
| <i>GM130</i>                                                  | <i>BD Biosciences</i>           | <i>610822</i>           |
| <i>p230</i>                                                   | <i>BD Biosciences</i>           | <i>611280</i>           |
| <i>SCD1</i>                                                   | <i>Cell Signaling</i>           | <i>2438</i>             |
| <i>FAS</i>                                                    | <i>Cell Signaling</i>           | <i>3180</i>             |
| <i>HMGCS</i>                                                  | <i>Cell Signaling</i>           | <i>36877</i>            |
| <i>Lamin B1</i>                                               | <i>Cell Signaling</i>           | <i>13435</i>            |
| <i>RCAS1</i>                                                  | <i>Cell Signaling</i>           | <i>12290</i>            |
| <i>Anti-Mouse Secondary Antibody</i>                          | <i>Cell Signaling</i>           | <i>7076</i>             |
| <i>Anti-Rabbit Secondary Antibody</i>                         | <i>Cell Signaling</i>           | <i>7074</i>             |
| <i>HA</i>                                                     | <i>Cell Signaling</i>           | <i>3724</i>             |
| <i>Beta-Actin</i>                                             | <i>Genetex</i>                  | <i>GTX109639</i>        |
| <i>MBTPS1</i>                                                 | <i>Genetex</i>                  | <i>GTX32714</i>         |
| <i>FDFT1</i>                                                  | <i>ProteinTech</i>              | <i>13128-1-AP</i>       |
| <i>SQLE</i>                                                   | <i>ProteinTech</i>              | <i>12544-1-AP</i>       |
| <i>SREBP1</i>                                                 | <i>Santa Cruz</i>               | <i>sc-13551</i>         |
| <i>HMGCR</i>                                                  | <i>Santa Cruz</i>               | <i>sc-33827</i>         |
| <i>MVK</i>                                                    | <i>Santa Cruz</i>               | <i>sc-390669</i>        |
| <i>MVD</i>                                                    | <i>Santa Cruz</i>               | <i>sc-376975</i>        |
| <i>OSC</i>                                                    | <i>Santa Cruz</i>               | <i>sc-514507</i>        |
| <i>DHCR24</i>                                                 | <i>Santa Cruz</i>               | <i>sc-398938</i>        |
| <i>FLAG</i>                                                   | <i>Sigma</i>                    | <i>F1804</i>            |
| <i>PDI</i>                                                    | <i>Sigma</i>                    | <i>P7496</i>            |
| <i>Donkey anti-Mouse Secondary Antibody, Alexa Fluor 568</i>  | <i>Thermo Fisher Scientific</i> | <i>A10037</i>           |
| <i>Donkey anti-Rabbit Secondary Antibody, Alexa Fluor 488</i> | <i>Thermo Fisher Scientific</i> | <i>A21206</i>           |
| <i>C12ORF49</i>                                               | <i>YenZym</i>                   | <i>N/A<br/>(Custom)</i> |
| <i>TMEM41A</i>                                                | <i>YenZym</i>                   | <i>N/A<br/>(Custom)</i> |

## COMPOUNDS

| Name                                                     | SOURCE                                | IDENTIFIER         |
|----------------------------------------------------------|---------------------------------------|--------------------|
| <i>Sodium Acetate (1-13C)</i>                            | <i>Cambridge Isotope Laboratories</i> | <i>CLM-156-1</i>   |
| <i>Palmitic Acid</i>                                     | <i>Cayman Chemical Company</i>        | <i>10006627</i>    |
| <i>Sodium Acetate</i>                                    | <i>Fisher Scientific</i>              | <i>S210-500</i>    |
| <i>Low Density Lipoprotein (LDL)</i>                     | <i>Lee BioSolutions</i>               | <i>360-10</i>      |
| <i>Mevastatin</i>                                        | <i>Selleck Chemicals</i>              | <i>S4223</i>       |
| <i>Cholesterol</i>                                       | <i>Sigma-Aldrich</i>                  | <i>C8667</i>       |
| <i>25-hydroxycholesterol</i>                             | <i>Sigma-Aldrich</i>                  | <i>H1015</i>       |
| <i>Mevalonate</i>                                        | <i>Sigma-Aldrich</i>                  | <i>90469</i>       |
| <i>Calpain Inhibitor I, N-Acetyl-Leu-Leu-norleucinal</i> | <i>Sigma-Aldrich</i>                  | <i>11086090001</i> |
| <i>Brefeldin A</i>                                       | <i>Sigma-Aldrich</i>                  | <i>B7651-5MG</i>   |
| <i>Bovine Serum Albumin Fraction V Fatty Acid Free</i>   | <i>Sigma-Aldrich</i>                  | <i>3117057001</i>  |

## KITS/ SUPPLIES

| Name                                                           | SOURCE                           | IDENTIFIER         |
|----------------------------------------------------------------|----------------------------------|--------------------|
| <i>Oil Red O, certified by the Biological Stain Commission</i> | <i>Alfa Aesar</i>                | <i>AAA1298914</i>  |
| <i>Tris-HCl</i>                                                | <i>Amresco</i>                   | <i>M108</i>        |
| <i>Triton X-100</i>                                            | <i>Amresco</i>                   | <i>M143-1L</i>     |
| <i>2x SYBR Green qPCR Master Mix</i>                           | <i>BioTools</i>                  | <i>B21202</i>      |
| <i>Cell Fractionation Kit</i>                                  | <i>Cell Signaling Technology</i> | <i>9038S</i>       |
| <i>PBS</i>                                                     | <i>Corning</i>                   | <i>21-040-CM</i>   |
| <i>Methanol (Optima™)</i>                                      | <i>Fisher Scientific</i>         | <i>A454-4</i>      |
| <i>Water (Optima™)</i>                                         | <i>Fisher Scientific</i>         | <i>W6-4</i>        |
| <i>Chloroform (Optima™)</i>                                    | <i>Fisher Scientific</i>         | <i>C297-4</i>      |
| <i>Potassium Hydroxide</i>                                     | <i>Fisher Scientific</i>         | <i>P250-500</i>    |
| <i>Hydrochloric Acid</i>                                       | <i>Fisher Scientific</i>         | <i>A144S-500</i>   |
| <i>Acetonitrile (Optima™)</i>                                  | <i>Fisher Scientific</i>         | <i>A955-1</i>      |
| <i>2-Propanol (Optima™)</i>                                    | <i>Fisher Scientific</i>         | <i>A461-4</i>      |
| <i>Fisherbrand Microscope Cover Glass</i>                      | <i>Fisherbrand</i>               | <i>12-541A</i>     |
| <i>RPMI 1640</i>                                               | <i>Gibco</i>                     | <i>11875127</i>    |
| <i>DMEM</i>                                                    | <i>Gibco</i>                     | <i>11965092</i>    |
| <i>Trypsin</i>                                                 | <i>Gibco</i>                     | <i>25200</i>       |
| <i>Penicillin-Streptomycin</i>                                 | <i>Gibco</i>                     | <i>15140122</i>    |
| <i>Blasticidin</i>                                             | <i>Invivogen</i>                 | <i>ant-bl</i>      |
| <i>Normal Donkey Serum</i>                                     | <i>Jackson ImmunoResearch</i>    | <i>017-000-121</i> |
| <i>Fetal Bovine Lipoprotein Depleted Serum</i>                 | <i>Kalen BioMedical</i>          | <i>880100-5</i>    |
| <i>NEB Stable Competent E.coli (High Efficiency)</i>           | <i>New England Biolabs</i>       | <i>C3040I</i>      |
| <i>PNGase F</i>                                                | <i>New England Biolabs</i>       | <i>P0704S</i>      |
| <i>Endo H</i>                                                  | <i>New England Biolabs</i>       | <i>P0702S</i>      |
| <i>Endo D</i>                                                  | <i>New England Biolabs</i>       | <i>P0742S</i>      |
| <i>O-Glycosidase and Neuraminidase Bundle</i>                  | <i>New England Biolabs</i>       | <i>E0540S</i>      |
| <i>BamHI-HF</i>                                                | <i>New England Biolabs</i>       | <i>R3136T</i>      |
| <i>NotI-HF</i>                                                 | <i>New England Biolabs</i>       | <i>R3189M</i>      |
| <i>BsmBI</i>                                                   | <i>New England Biolabs</i>       | <i>R0580L</i>      |
| <i>Protein Deglycosylation Mix II</i>                          | <i>New England Biolabs</i>       | <i>P6044S</i>      |
| <i>T4 DNA Ligase</i>                                           | <i>New England Biolabs</i>       | <i>M0202L</i>      |
| <i>Cas9 protein</i>                                            | <i>PNA Bio</i>                   | <i>CP01-50</i>     |
| <i>CellTiter-Glo Luminescent Cell Viability Assay</i>          | <i>Promega</i>                   | <i>G7573</i>       |
| <i>Dual-Glo® Luciferase Assay System</i>                       | <i>Promega</i>                   | <i>E2920</i>       |

|                                                                               |                                 |                    |
|-------------------------------------------------------------------------------|---------------------------------|--------------------|
| <i>RNEasy Mini Kit</i>                                                        | <i>Qiagen</i>                   | <i>74104</i>       |
| <i>QIAprep Spin Miniprep Kit</i>                                              | <i>Qiagen</i>                   | <i>27106</i>       |
| <i>DNeasy Blood and Tissue Kit</i>                                            | <i>Qiagen</i>                   | <i>69504</i>       |
| <i>X-tremeGENE 9 DNA Transfection Reagent</i>                                 | <i>Roche</i>                    | <i>6365809001</i>  |
| <i>cOmplete™, Mini, EDTA-free Protease Inhibitor Cocktail</i>                 | <i>Roche</i>                    | <i>4693159001</i>  |
| <i>Poly-D-lysine</i>                                                          | <i>Sigma-Aldrich</i>            | <i>P6407</i>       |
| <i>Fetal Bovine Serum</i>                                                     | <i>Sigma-Aldrich</i>            | <i>12303C</i>      |
| <i>Polybrene Infection Reagent</i>                                            | <i>Sigma-Aldrich</i>            | <i>H9268</i>       |
| <i>Puromycin</i>                                                              | <i>Sigma-Aldrich</i>            | <i>P8833</i>       |
| <i>EGTA</i>                                                                   | <i>Sigma-Aldrich</i>            | <i>E0396</i>       |
| <i>Anti-FLAG M2 Magnetic Beads</i>                                            | <i>Sigma-Aldrich</i>            | <i>M8823-1ML</i>   |
| <i>HPLC grade hexanes</i>                                                     | <i>Sigma-Aldrich</i>            | <i>439177</i>      |
| <i>Sodium formate</i>                                                         | <i>Sigma-Aldrich</i>            | <i>71539-500G</i>  |
| <i>Ammonium formate</i>                                                       | <i>Sigma-Aldrich</i>            | <i>516961-100G</i> |
| <i>Ascentis® Express C18, 2.7 µm HPLC Column</i>                              | <i>Sigma-Aldrich</i>            | <i>53825-U</i>     |
| <i>Pierce™ BCA Protein Assay Kit</i>                                          | <i>Thermo Fisher Scientific</i> | <i>23225</i>       |
| <i>Sodium Chloride</i>                                                        | <i>Thermo Fisher Scientific</i> | <i>S271-3</i>      |
| <i>Novex™ 8% Tris-Glycine Mini Gels, WedgeWell™ format, 15-well</i>           | <i>Thermo Fisher Scientific</i> | <i>XP00085BOX</i>  |
| <i>Novex™ 16% Tris-Glycine Mini Gels, WedgeWell™ format, 15-well</i>          | <i>Thermo Fisher Scientific</i> | <i>XP00165BOX</i>  |
| <i>Novex™ 10-20% Tris-Glycine Mini Gels, WedgeWell™ format, 15-well</i>       | <i>Thermo Fisher Scientific</i> | <i>XP10205BOX</i>  |
| <i>Novex™ 12% Tris-Glycine Mini Gels, WedgeWell™ format, 15-well</i>          | <i>Thermo Fisher Scientific</i> | <i>XP00125BOX</i>  |
| <i>ProLong® Gold Antifade Mountant</i>                                        | <i>Thermo Fisher Scientific</i> | <i>P10144</i>      |
| <i>Molecular Probes DAPI (4',6 Diamidino 2 Phenylindole, Dihydrochloride)</i> | <i>Thermo Fisher Scientific</i> | <i>D1306</i>       |
| <i>DSP (dithiobis(succinimidyl propionate)), Lomant's Reagent</i>             | <i>Thermo Fisher Scientific</i> | <i>22585</i>       |
| <i>Superscript III First Strand Synthesis System</i>                          | <i>Thermo Fisher Scientific</i> | <i>18080-051</i>   |
| <i>Formaldehyde, 16%</i>                                                      | <i>Thermo Scientific</i>        | <i>28908</i>       |
| <i>EDTA Free Acid</i>                                                         | <i>VWR</i>                      | <i>0322</i>        |

|                                         |            |                  |
|-----------------------------------------|------------|------------------|
| <i>Sodium Dodecyl Sulfate<br/>(SDS)</i> | <i>VWR</i> | <i>0227-1KG</i>  |
| <i>Sodium Hydroxide Pellets</i>         | <i>VWR</i> | <i>0583-500G</i> |

## EXPERIMENTAL MODELS

| Cell Lines        | Source      |
|-------------------|-------------|
| <i>Jurkat</i>     | <i>ATCC</i> |
| <i>U-87 MG</i>    | <i>ATCC</i> |
| <i>MDA-MB-435</i> | <i>ATCC</i> |
| <i>HEK293T</i>    | <i>ATCC</i> |
| <i>BHK-21</i>     | <i>ATCC</i> |

| D.rerio             | Source                                        |
|---------------------|-----------------------------------------------|
| <i>AB (WT)</i>      | <i>Dr. Ela W.<br/>Knapik's<br/>laboratory</i> |
| <i>mbtps1hi1487</i> | <i>Dr. Ela W.<br/>Knapik's<br/>laboratory</i> |

## PLASMID CONSTRUCTS

| Name                                             | SOURCE                                      | Identifier     |
|--------------------------------------------------|---------------------------------------------|----------------|
| <i>pCMV-Dr8.2 dvpr</i>                           | <i>Addgene</i>                              | <i>8455</i>    |
| <i>pLenti CRISPR</i>                             | <i>Addgene</i>                              | <i>49535</i>   |
| <i>pLenti CRISPR v2</i>                          | <i>Addgene</i>                              | <i>52961</i>   |
| <i>pCMV-Gag-pol</i>                              | <i>Cell Biolabs</i>                         | <i>RV-111</i>  |
| <i>pCMV-VSV-G</i>                                | <i>Cell Biolabs</i>                         | <i>RV-110</i>  |
| <i>pMXs-IRES-blast</i>                           | <i>Cell Biolabs</i>                         | <i>RTV-016</i> |
| <i>CRISPR Cas9 sgRNA Library</i>                 | <i>Custom (Integrated DNA Technologies)</i> |                |
| <i>pGL4.20[luc2/Puro] Vector</i>                 | <i>Promega</i>                              | <i>E6751</i>   |
| <i>pRL SV40</i>                                  | <i>Promega</i>                              | <i>E2231</i>   |
| <i>pGL4.20 3XSRE</i>                             | <i>This Study</i>                           |                |
| <i>pLenti CRISPR c12orf49</i>                    | <i>This Study</i>                           |                |
| <i>pLenti CRISPR TMEM41A</i>                     | <i>This Study</i>                           |                |
| <i>pMXs-IRES-blast 2XFLAG-B3GALT1</i>            | <i>This Study</i>                           |                |
| <i>pMXs-IRES-blast 3XFLAG-c12orf49</i>           | <i>This Study</i>                           |                |
| <i>pMXs-IRES-blast 3XFLAG-DUF2054</i>            | <i>This Study</i>                           |                |
| <i>pMXs-IRES-blast 3XFLAG-DUF2054-KDEL</i>       | <i>This Study</i>                           |                |
| <i>pMXs-IRES-blast B3GALT1-3XFLAG-DUF2054</i>    | <i>This Study</i>                           |                |
| <i>pMXs-IRES-blast c12orf49</i>                  | <i>This Study</i>                           |                |
| <i>pMXs-IRES-blast c12orf49 (a. thaliana)</i>    | <i>This Study</i>                           |                |
| <i>pMXs-IRES-blast c12orf49 (c. reinhardtii)</i> | <i>This Study</i>                           |                |
| <i>pMXs-IRES-blast c12orf49 (d.melanogaster)</i> | <i>This Study</i>                           |                |
| <i>pMXs-IRES-blast c12orf49 (d.rerio)</i>        | <i>This Study</i>                           |                |
| <i>pMXs-IRES-blast COX4L1-3XFLAG-DUF2054</i>     | <i>This Study</i>                           |                |
| <i>pMXs-IRES-blast CREB3L2-HA</i>                | <i>This Study</i>                           |                |
| <i>pMXs-IRES-blast CREB4-HA</i>                  | <i>This Study</i>                           |                |
| <i>pMXs-IRES-blast GNPTAB-HA</i>                 | <i>This Study</i>                           |                |
| <i>pMXs-IRES-blast mCherry-SREBP1</i>            | <i>This Study</i>                           |                |
| <i>pMXs-IRES-blast mCherry-SREBP2</i>            | <i>This Study</i>                           |                |
| <i>pMXs-IRES-blast TMEM41A</i>                   | <i>This Study</i>                           |                |

## RT-PCR PRIMERS

| Name             | Sequence                        |
|------------------|---------------------------------|
| <i>ACACA_F</i>   | <i>ATGTCTGGCTTGCACCTAGTA</i>    |
| <i>ACACA_R</i>   | <i>CCCCAAAGCGAGTAACAAATTCT</i>  |
| <i>ACLY_F</i>    | <i>ATCGGTTCAAGTATGCTCGGG</i>    |
| <i>ACLY_R</i>    | <i>GACCAAGTTTTCCACGACGTT</i>    |
| <i>ACTB_F</i>    | <i>TTTTGGCTATACCCTACTGGCA</i>   |
| <i>ACTB_R</i>    | <i>CTGCACAGTCGTCAGCATATC</i>    |
| <i>FASN_F</i>    | <i>GCTGCGGAAACTTCAGGAAAT</i>    |
| <i>FASN_R</i>    | <i>AGAGACGTGTCACCTCCTGGACTT</i> |
| <i>FDFT1_F</i>   | <i>GCAACGCAGTGTGCATATTTT</i>    |
| <i>FDFT1_R</i>   | <i>CGCCAGTCTGGTTGGTAAAGG</i>    |
| <i>HMGCR_F</i>   | <i>TGATTGACCTTTCCAGAGCAAG</i>   |
| <i>HMGCR_R</i>   | <i>CTAAAATTGCCATTCCACGAGC</i>   |
| <i>HMGCS1_F</i>  | <i>CTCTTGGGATGGACGGTATGC</i>    |
| <i>HMGCS1_R</i>  | <i>GCTCCAACCTCCACCTGTAGG</i>    |
| <i>HSD17B7_F</i> | <i>GACCTTTTGAGTGTGGCTTTG</i>    |
| <i>HSD17B7_R</i> | <i>TGTAATCAGGGCTCTGCAGCT</i>    |
| <i>SCD1_F</i>    | <i>TCTAGCTCCTATACCACCACCA</i>   |
| <i>SCD1_R</i>    | <i>TCGTCTCCAACCTATCTCCTCC</i>   |
| <i>SQLE_F</i>    | <i>GATGATGCAGCTATTTTCGAGGC</i>  |
| <i>SQLE_R</i>    | <i>CCTGAGCAAGGATATTCACGACA</i>  |
| <i>SREBF1_F</i>  | <i>TGCATTTTCTGACACGCTTC</i>     |
| <i>SREBF1_R</i>  | <i>CCAAGCTGTACAGGCTCTCC</i>     |
| <i>SREBF2_F</i>  | <i>TGGCTTCTCTCCCTACTCCA</i>     |
| <i>SREBF2_R</i>  | <i>GAGAGGCACAGGAAGGTGAG</i>     |
| <i>SREPB1c_F</i> | <i>GCCTATTTGACCCACCCTA</i>      |
| <i>SREPB1c_R</i> | <i>TGGCACTGACTCTTCCTTG</i>      |
